# Supplementary material for: Femtosecond laser composite manufactured double-bionic micro–nano structure for efficient photothermal anti-icing/deicing
Source: Royal Society of Chemistry journal article supplement (doi:10.1039/d4mh00500g), 2024-01-01
Supplement: d4mh00500g6.pdf [file d4mh00500g6.pdf]

## Supporting Information

# **Femtosecond Laser Composite Manufacturing Double Bionic Micro-Nano Structure for Efficient Photothermal Anti- Icing/Deicing**

Sensen Xuan,<sup>‡a</sup> Huan Yin,<sup>‡a</sup> Guoqiang Li,<sup>\*a</sup> Yi Yang,<sup>a</sup> Yuan Wang,<sup>a</sup> Jiasong Liu,<sup>a</sup>  
Senyun Liu,<sup>\*b</sup> Xiaohong Li,<sup>a</sup> Yuegan Song,<sup>a</sup> Tingni Wu,<sup>c</sup> and Kai Yin<sup>\*c</sup>

<sup>a</sup> School of Manufacture Science and Engineering, School of Information Engineering, Key Laboratory of Testing Technology for Manufacturing Process, Ministry of Education, Southwest University of Science and Technology, Mianyang 621010, P. R. China. E-mail: [guoqli@ustc.edu.cn](mailto:guoqli@ustc.edu.cn)

<sup>b</sup> Key Laboratory of Icing and Anti/Deicing, China Aerodynamics Research and Development Center, Mianyang 621000, P. R. China. E-mail: [liusenyun@cardc.cn](mailto:liusenyun@cardc.cn)

<sup>c</sup> Hunan Key Laboratory of Nanophotonics and Devices, School of Physics, Central South University, Changsha 410083, P. R. China. E-mail: [kaiyin@csu.edu.cn](mailto:kaiyin@csu.edu.cn)

<sup>‡</sup> These authors contributed equally to this work.

## The detailed calculation process of $Q$ :<sup>1</sup>

When surface temperature is constant, the amount of heat generated by the photothermal conversion of material is equal to the amount of heat dissipation to the surrounding environment.

$$Q = Q_s = h \times A \times (T_{sub} - T_{surr}) \quad (1)$$

where  $Q$  is the heat generated by the photothermal conversion of material.  $Q_s$  is the heat dissipation to surrounding environment.  $A$  is the surface area, 4 cm<sup>2</sup>.  $T_{sub}$  is the surface temperature at a stable state.  $T_{surr}$  is surrounding temperature, 25°C.  $h$  represents the average convective heat transfer coefficient, which can be calculated according to Eq. 2.

$$N_u = \frac{h \times L}{\lambda} \quad (2)$$

where  $L$  represents the characteristic length of heat transfer region, 2 cm.  $\lambda$  is the thermal conductivity coefficient of air.  $N_u$  is Nusselt number, which can be calculated according to Eq. 3.

$$N_u = 0.54 \times (G_r \times P_r)_m^{1/4} \quad (3)$$

where  $G_r$  is Grashof number.  $P_r$  is Prandtl number. The subscript m represents parameters at temperature  $T_m = (T_{sub} + T_{surr})/2$ .  $G_r$  and  $P_r$  can be calculated according to Eq. 4-5.

$$G_r = \frac{g \alpha_v \Delta T L^3}{\nu^2} \quad (4)$$

$$P_r = \frac{\nu}{a} \quad (5)$$

where  $g$  represents the acceleration of gravity,  $9.8 \text{ m/s}^2$ .  $\alpha_v$  is volume expansion coefficient,  $1/T$ .  $\Delta T$  represents the temperature difference between air and surface.  $\nu$  is viscosity coefficient.  $a$  represents thermal diffusivity.

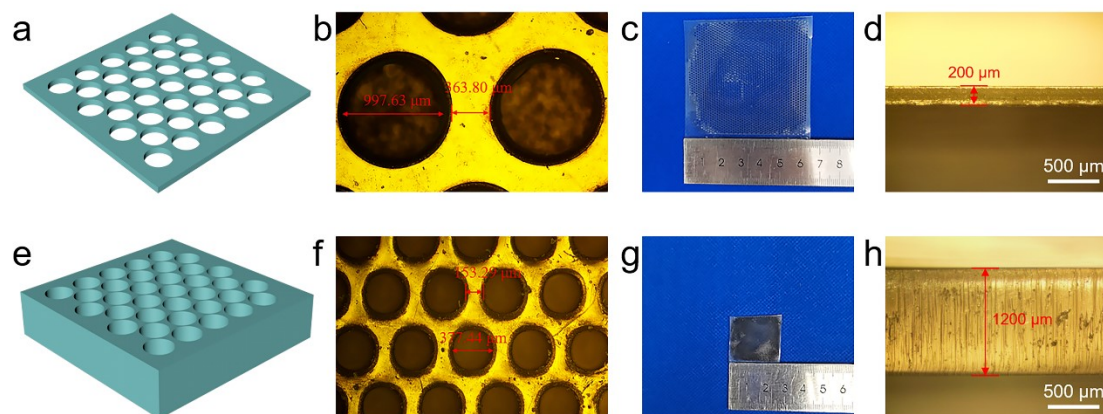

**Fig. S1** Geometric characteristics, optical microscope images, and optical images of porous shape memory polystyrene membrane (PSM) film before (a), (b), (c), (d) and after (e), (f), (g), (h) thermal shrinkage.

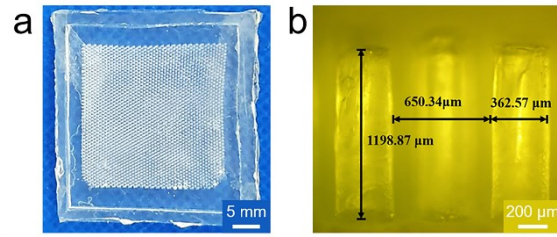

**Fig. S2** (a) Optical image of PDMS template. (b) Structural parameters of PDMS template.

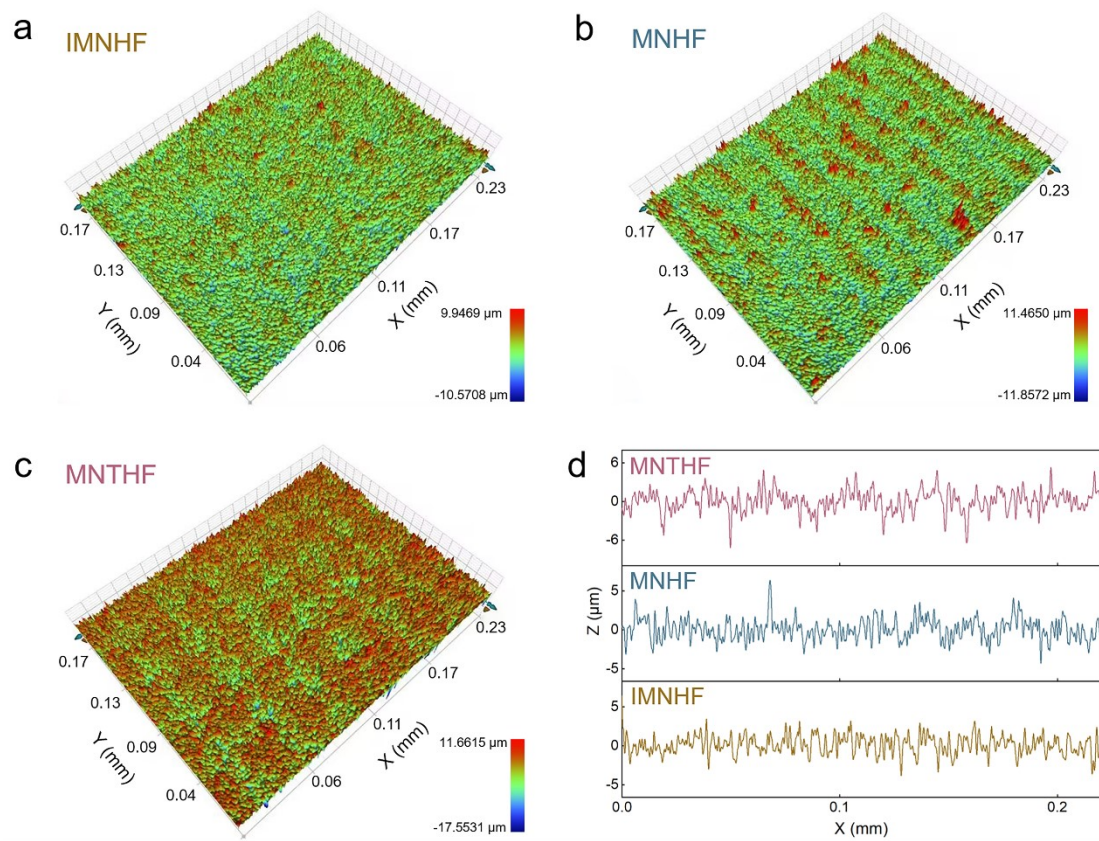

**Fig. S3** The 3D surface topography of (a) IMNHF, (b) MNHF, and (c) MNTHF. (d) Cross section profiles of IMNHF, MNHF, and MNTHF.

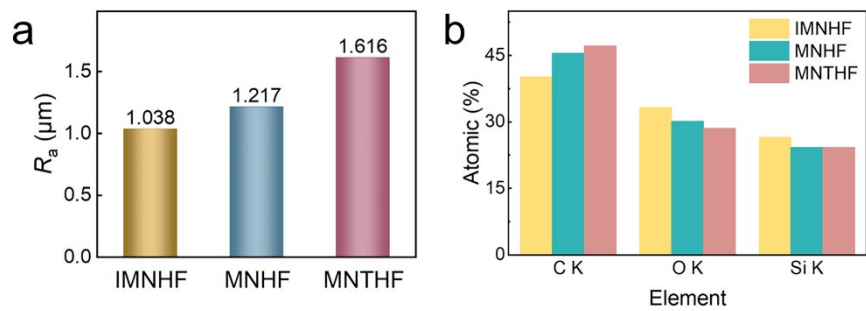

**Fig. S4** (a) Roughness of IMNHF, MNHF, and MNTHF. (b) Element content analysis of IMNHF, MNHF, and MNTHF.

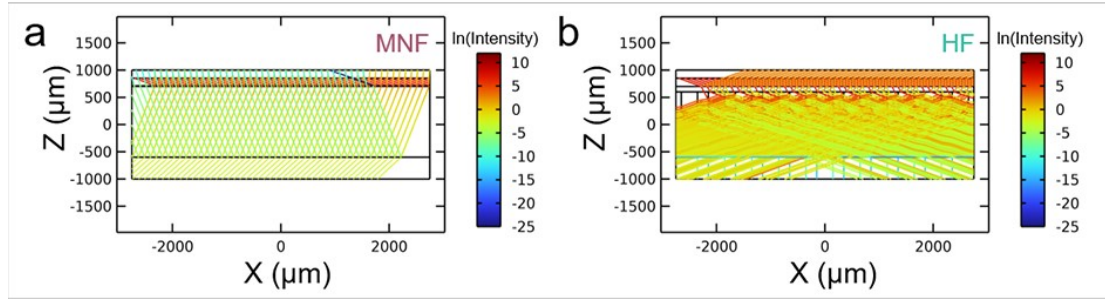

**Fig. S5** (a) Ray-tracing simulation results of MNF surface. (b) Ray-tracing simulation results of HF surface.



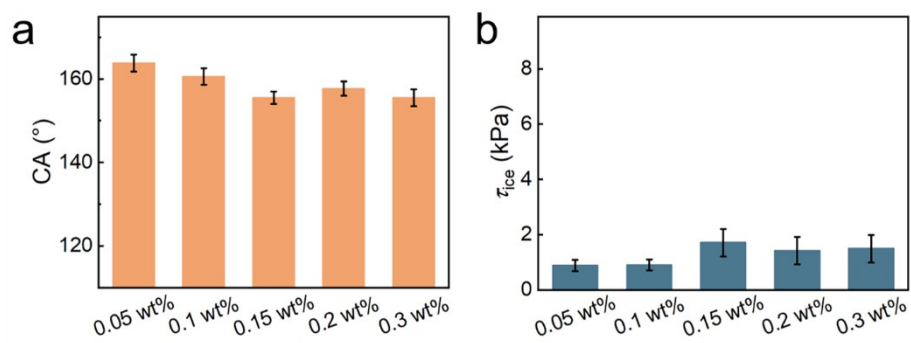

**Fig. S6** (a) Effect of the concentration of MWCNTs on CAs. (b) Effect of the concentration of MWCNTs on ice adhesion strength.

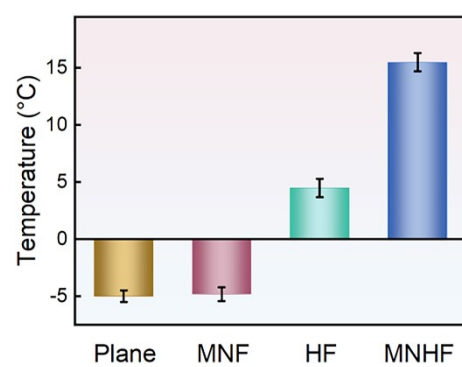

**Fig. S7** Temperatures of Plane, MNF, HF, and MNHF surfaces at -10 °C for 10 min.

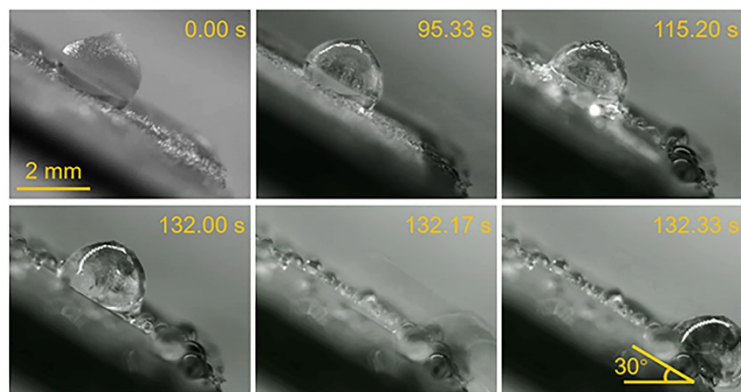

**Fig. S8** Ice melting process on MNHF surface at 30° inclination.

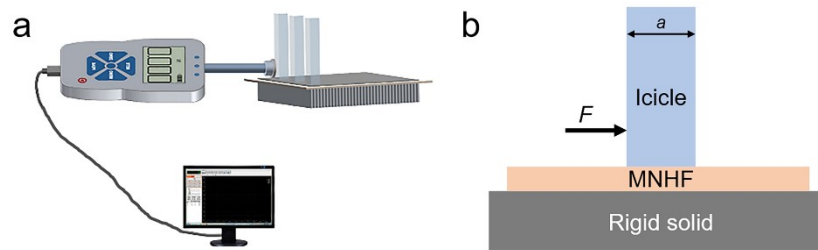

**Fig. S9** (a) Ice adhesion strength measuring device. (b) Schematic diagram of measuring process.

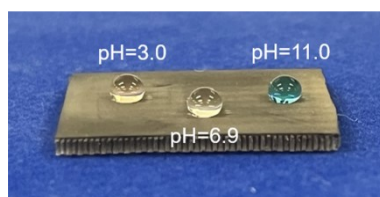

**Fig. S10** Optical image of solutions with different pH on MNHF surface.

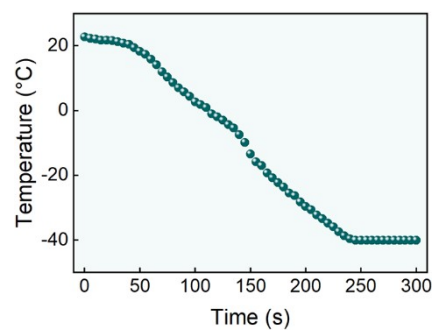

**Fig. S11** The temperature changes of cooling table over time.

**Table S1** The data related to calculation of photothermal conversion efficiency.

| Parameters                                | Plane  | MNF    | HF     | MNHF   |
|-------------------------------------------|--------|--------|--------|--------|
| $T_s$ (°C)                                | 53     | 62     | 61     | 63     |
| $\Delta T$ (°C)                           | 28     | 37     | 36     | 38     |
| $T_m$ (°C)                                | 39     | 43.5   | 43     | 44     |
| $T$ (K)                                   | 312    | 316.5  | 316    | 317    |
| $P_r$                                     | 0.733  | 0.733  | 0.733  | 0.733  |
| $N_u$                                     | 6.054  | 6.382  | 6.349  | 6.413  |
| $Q$ (mW)                                  | 89.67  | 126.57 | 122.33 | 130.81 |
| $\lambda \times 10^2$ (W/m·K)             | 2.645  | 2.680  | 2.676  | 2.684  |
| $\nu \times 10^6$ (m <sup>2</sup> /s)     | 17.50  | 17.95  | 17.90  | 18.00  |
| $a \times 10^6$ (m <sup>2</sup> /s)       | 23.886 | 24.504 | 24.436 | 24.572 |
| $\alpha_v \times 10^3$ (K <sup>-1</sup> ) | 3.21   | 3.16   | 3.16   | 3.15   |
| $G_r \times 10^{-4}$                      | 2.155  | 2.665  | 2.607  | 2.713  |
| $h$ (W/m <sup>2</sup> ·K)                 | 8.006  | 8.552  | 8.495  | 8.606  |
| $\eta$ (%)                                | 22.42  | 31.64  | 30.58  | 32.70  |

**Movie S1:** Heat shrinkage process of porous PSM

**Movie S2:** Photothermal deicing processes of MNHF, MNF, and HF

**Movie S3:** Liquid droplet returns to Cassie state under light conditions

**Movie S4:** Ice melting process on MNHF surface at 30° inclination

**Movie S5:** Self-cleaning experiment



## Reference

- 1 Z. Xie, H. Wang, M. Li, Y. Tian, Q. Deng, R. Chen, X. Zhu and Q. Liao, *Chem. Eng. J.*, 2022, **435**, 135025.
